# Supplementary material for: Experimental evidence for the formation of liquid saline water on Mars
Source: PubMed Central journal article supplement — Geophys Res Lett. 2014 Jul 7;41(13):4456–62. doi: 10.1002/grl.51829 (PMC4373172; doi:10.1002/grl.51829), 2014-07-07
Supplement: grl0041-4456-SD1.pdf [file grl0041-4456-SD1.pdf]

## Auxiliary Material for

### Experimental evidence for the formation of liquid saline water on Mars

Erik Fischer<sup>1</sup>, Germán M. Martínez<sup>1</sup>, Harvey M. Elliott<sup>1</sup>, and Nilton O. Rennó<sup>1</sup>

<sup>1</sup> Department of Atmospheric, Oceanic and Space Sciences, University of Michigan, Ann Arbor, MI, USA

Geophysical Research Letters, 2014

Manuscript #: 2014GL060302

#### Introduction

This auxiliary material for manuscript 2014GL060302 consists of a supplemental table to provide data for main and auxiliary figures and two supplemental figures to compare experiments with sodium perchlorate to those with calcium perchlorate from the main body.

1. **ts01.pdf** Table showing data necessary to reproduce decomposition figures from the main body and figures in the auxiliary material. The table is labeled and includes a description in form of a caption.
  - 1.1 Column “Figure”, figure which this dataset refers to.
  - 1.2 Column “Peaks”, number of Gaussian peaks in the referenced figure.
  - 1.3 Column “Peak center”,  $\text{cm}^{-1}$ , center wavenumber of the Gaussian.
  - 1.4 Column “Peak height”, arbitrary units, amplitude of the peak.
  - 1.5 Column “Peak FWHM”,  $\text{cm}^{-1}$ , Full Width Half Maximum of the peak.
  - 1.6 Column “ $\bar{R}^2$ ”, adjusted coefficient of determination of the Gaussian decomposition.
2. **fs01.png** (Figure S1) Spectra of sodium perchlorate in contact with ice. Experiments similar to those for  $\text{Ca}(\text{ClO}_4)_2$  were performed for  $\text{NaClO}_4$  in contact with ice while the temperature of the sample was raised above its eutectic temperature  $T_E \approx -37^\circ\text{C}$  at the typical rate occurring diurnally in the shallow Martian subsurface. When the crystalline salt (here mostly anhydrous  $\text{NaClO}_4$  but with small peaks in the O-H region indicating partial hydration) hydrates or forms a liquid solution, the  $954\text{ cm}^{-1}$  peak in the Raman spectrum shifts toward  $937\text{ cm}^{-1}$ . The appearance of the typical O-H vibrational band for liquid water

indicates the occurrence of a liquid solution within about 1 hour of the start of the experiment, when the salt is in contact with ice at environmental conditions of Mars' polar region.

3. **fs02.png** (Figure S2) Decomposed OH vibrational spectrum of  $\text{NaClO}_4$  in contact with ice at  $-18\text{ }^\circ\text{C}$ . The O-H vibrational spectrum at  $-18\text{ }^\circ\text{C}$  shown in Figure S1 contain four Gaussians components at  $3230$ ,  $3437$ ,  $3559$ , and  $3610\text{ cm}^{-1}$  with  $\text{FWHM} > 50\text{ cm}^{-1}$  indicating the presence of liquid water.  $\bar{R}^2 \approx 1.000$ .
