# Supplementary material for: Experimental evidence for the formation of liquid saline water on Mars
Source: PubMed Central journal article supplement — Geophys Res Lett. 2014 Jul 7;41(13):4456–62. doi: 10.1002/grl.51829 (PMC4373172; doi:10.1002/grl.51829), 2014-07-07
Supplement: grl0041-4456-SD2.pdf [file grl0041-4456-SD2.pdf]

**Table S1.** Characteristics of the Gaussian decompositions of the spectra shown in the figures of this letter.

| Figure | Peaks | Peak Center (cm <sup>-1</sup> ) | Peak Height | Peak FWHM | $\bar{R}^2$ |
|--------|-------|---------------------------------|-------------|-----------|-------------|
| 1a     | 8     | 3445.67                         | 0.09        | 37.32     | 0.999       |
|        |       | 3471.12                         | 0.08        | 20.00     |             |
|        |       | 3487.49                         | 0.10        | 23.74     |             |
|        |       | 3515.20                         | 0.07        | 29.08     |             |
|        |       | 3541.86                         | 0.04        | 24.94     |             |
|        |       | 3564.14                         | 0.02        | 70.13     |             |
|        |       | 3603.29                         | 0.03        | 16.62     |             |
|        |       | 3628.01                         | 0.04        | 19.00     |             |
| 1b     | 5     | 3046.41                         | 0.12        | 99.07     | 0.997       |
|        |       | 3114.74                         | 0.51        | 56.51     |             |
|        |       | 3227.14                         | 0.30        | 206.09    |             |
|        |       | 3335.80                         | 0.05        | 56.19     |             |
|        |       | 3399.35                         | 0.19        | 140.46    |             |
| 1c     | 4     | 3230.00                         | 0.50        | 216.80    | 0.997       |
|        |       | 3420.00                         | 0.59        | 218.13    |             |
|        |       | 3540.00                         | 0.21        | 205.79    |             |
|        |       | 3620.00                         | 0.09        | 109.38    |             |
| 2b     | 8     | 3446.92                         | 0.10        | 40.44     | 0.999       |
|        |       | 3470.38                         | 0.05        | 18.89     |             |
|        |       | 3486.42                         | 0.10        | 26.79     |             |
|        |       | 3515.84                         | 0.08        | 28.14     |             |
|        |       | 3541.44                         | 0.06        | 24.52     |             |
|        |       | 3562.39                         | 0.03        | 71.15     |             |
|        |       | 3603.51                         | 0.03        | 17.78     |             |
|        |       | 3628.01                         | 0.04        | 18.04     |             |
| 3b     | 12    | 3067.00                         | 0.02        | 143.83    | 0.999       |
|        |       | 3120.26                         | 0.04        | 59.22     |             |
|        |       | 3235.63                         | 0.03        | 161.31    |             |
|        |       | 3410.35                         | 0.04        | 167.22    |             |
|        |       | 3439.75                         | 0.09        | 31.23     |             |
|        |       | 3467.61                         | 0.13        | 20.22     |             |
|        |       | 3486.80                         | 0.11        | 20.05     |             |
|        |       | 3509.69                         | 0.07        | 22.22     |             |
|        |       | 3535.76                         | 0.07        | 30.43     |             |
|        |       | 3576.71                         | 0.03        | 50.00     |             |
|        |       | 3602.46                         | 0.04        | 14.71     |             |
|        |       | 3630.48                         | 0.05        | 29.89     |             |
| 3c     | 7     | 3059.77                         | 0.13        | 138.23    | 0.999       |
|        |       | 3126.56                         | 0.32        | 62.21     |             |
|        |       | 3249.65                         | 0.37        | 241.34    |             |
|        |       | 3356.42                         | 0.13        | 81.32     |             |
|        |       | 3424.28                         | 0.19        | 92.20     |             |
|        |       | 3544.89                         | 0.26        | 160.28    |             |
|        |       | 3605.32                         | 0.02        | 34.22     |             |
| S2     | 4     | 3230.34                         | 0.11        | 177.75    | 1.000       |
|        |       | 3437.28                         | 0.25        | 251.41    |             |
|        |       | 3558.78                         | 0.09        | 83.42     |             |
|        |       | 3610.27                         | 0.10        | 73.01     |             |
